# Supplementary material
Source: publisher figshare collection journal article supplement (https://frontiersin.figshare.com/ndownloader/files/27357698)
Supplement: Supplementary file 1 [file 27357698]

## Sheet: ManuscriptTableS1
Table S1. The minimum (top row) and maximum (bottom row) of each environmental variable in each CCZ subregion and APEI. Values for each APEI are to the right of the CCZ subregion it is meant to represent. The CCZ subregion and APEI with the
highest maximum and minimum values for each variable are marked in dark blue while the variables with the lowest maximum and minimum values are marked in light blue. Values marked in green represent increases due to climate change.
Mean	NW	APEI 1 (NW)	NC	APEI 2 (NC)	NE	APEI 3 (NE)	CW	APEI 4 (CW)	CC	APEI 5 (CC)	CE	APEI 6 (CE)	SW	APEI 7 (SW)	SC	APEI 8 (SC)	SE	APEI 9 (SE)
Physiographic Data
Depth (etopo1) (m)	3878.79	5069.86	4722.28	4710.57	3828.07	4228.86	3641.02	4642.18	4658.58	4480.42	3779.08	3779.08	4363.67	4291.79	3984.18	3984.18	3637.17	4298.55
	5814.03	5814.03	5621.48	5405.06	5352.92	4971.29	5483.19	5165.61	5359.68	4947.13	5119.59	4435.14	5222.28	5143.85	5146.89	4977.13	4746.97	4704.17
Seamount Summit Depth (m)	663	3796	3579	2035	502	1851	1143	3213	2035	3466	460	502	2382	3220	2193	2193	460	N/A
	4730	4730	4774	3948	4150	3749	4201	3991	4110	3534	3461	3080	3957	3295	3534	3089	3274	N/A
Seamount Summit Height (m)	1034	1034	1007	1008	1005	1073	1002	1028	1033	1066	1004	1020	1028	1206	1005	1005	1032	N/A
	3667	1661	1584	2706	3488	2724	3209	1664	2706	1118	3801	3488	2353	1304	2004	2004	3801	N/A
Seamount Area (m2)	315.56	553.61	349.37	658.39	242.35	242.35	348.55	348.55	327.71	806.65	632.35	492.45	721.13	721.13	699.48	699.48	409.86	N/A
	1137.65	965.82	1049.88	1102.92	1097.02	1078.31	1102.46	1099.14	1102.92	934.54	1135.71	1054.65	1099.14	1093.22	1047.32	1047.32	1135.71	N/A
Knoll Summit Depth (m)	4144	4144	3940	3949	3026	3451	3762	3921	3707	3796	3187	3026	3515	3515	3299	3299	2854	3877
	5563	5563	5228	4799	5038	4586	5225	4998	5187	4666	4812	3886	4923	4601	4811	4506	4409	4409
Knoll Summit Height (m)	240	240	256	280	259	271	225	247	235	310	250	284	225	225	262	262	238	243
	1058	979	1065	1065	1050	953	1020	959	952	917	772	999	943	943	997	997	1036	642
Knoll Area (m2)	88.34	129.97	144.33	355.38	132.54	183.31	140.49	121.02	229.78	233.74	152.46	311.58	121.02	117.27	113.98	357.27	89.11	247.41
	1105.84	1072.16	1087.07	974.94	1092.07	1092.07	1137.77	1073.93	1060.28	1026.91	1047.2	1077.15	1132.7	786.59	1042.76	1038.42	1104.64	1001.33
Seafloor Slope (o)	0.09	0.09	0.13	0.2	0.21	0.45	0.21	0.77	0.16	0.07	0.09	0.23	0.06	0.1	0.07	0.15	0.03	0.09
	7.44	7.44	5.17	2.94	13.53	3.86	9.48	9.48	12.39	2.08	5.36	5.36	2.92	1.29	2.24	6.83	7.05	2.59
Resource Data
Nodule Abundance (kg/m2)	1.19	1.15	1.29	1.19	2.33	3.01	0.1	0.47	0.49	0.8	0.95	0.94	0.13	0.17	0.2	0.86	0.85	0.85
	8.17	8.13	9.52	8.98	9.59	8.24	14.63	8.55	14.92	1.95	19.79	4.45	8.55	4.1	4.62	2.05	12.53	5.67
Nodule Co (%)	0.23	0.23	0.2	0.21	0.2	0.23	0.11	0.13	0.12	0.15	0.14	0.2	0.07	0.14	0.12	0.13	0.09	0.17
	0.27	0.26	0.26	0.28	0.4	0.29	0.34	0.25	0.31	0.21	0.31	0.38	0.24	0.19	0.24	0.16	0.22	0.19
Nodule Ni (%)	1.01	0.88	0.85	0.85	0.86	0.88	0.8	0.85	0.9	1.25	1.06	0.96	0.88	1.43	1.09	1.14	1	1.01
	1.24	1.41	1.34	1.37	1.35	1.26	1.55	1.39	1.54	1.46	1.49	1.29	1.6	1.47	1.48	1.23	1.39	1.3
Nodule Cu (%)	0.79	0.65	0.59	0.67	0.63	0.66	0.49	0.66	0.65	1.01	0.71	0.63	0.87	1.23	1.01	1.1	0.78	1.13
	1.01	1.21	1.3	1.2	1.33	1.22	1.59	1.23	1.45	1.2	1.4	0.9	1.52	1.4	1.46	1.26	1.37	1.36
Nodule Mn (%)	21.7	23.2	20.14	21.94	21.44	23.35	17.55	18.38	20.68	27.44	24.58	25.39	18.38	29.73	27.44	29.19	27.93	30.6
	27.63	26.52	29.96	29.96	31.16	28.95	32.17	28.2	38.88	30.89	32.46	27.8	30.79	30.07	31.64	30.73	32.38	31.66
Sediment Data
Calcium Carbonate (%)	0.09	0.23	0.14	0.56	0.23	0.24	0	14.92	0	0.54	0	2.54	2.83	16.59	0.61	15.97	0	3.45
	15.05	0.74	4.2	14.4	6.75	0.75	43.19	42.72	17.84	63.72	7.86	7.86	73.51	77.64	78.01	77.1	55.98	47.86
Biogenic Silica (%)	2.92	6.5	3.02	3.61	2.44	2.44	5.64	13.74	4.32	7.45	3.97	4.55	12.39	15.99	8.18	12.17	10.47	12.76
	7.79	8.03	5.29	4.43	6.01	4.18	15.46	21.31	10.06	13.41	13.75	7.77	29.61	23.18	19.04	22.46	19.07	17.48
Sediment Thickness (m)	36	20	92	101	29	84	57	280	87	206	49	29	274	328	170	327	38	175
	297	83	103	102	102	98	413	421	250	384	134	71	549	516	561	548	255	298
Water-Column Data
Temperature (oC)	1.31	1.39	1.34	1.37	1.38	1.38	1.31	1.37	1.38	1.37	1.35	1.44	1.34	1.33	1.36	1.39	1.4	1.41
	1.89	1.47	1.5	1.48	1.57	1.51	1.78	1.48	1.52	1.47	1.95	1.55	1.48	1.44	1.48	1.48	1.66	1.49
Salinity	34.66	34.7	34.68	34.69	34.67	34.68	34.7	34.7	34.69	34.69	34.69	34.68	34.69	34.69	34.68	34.68	34.68	34.68
	34.7	34.7	34.7	34.7	34.7	34.7	34.7	34.7	34.7	34.7	34.69	34.69	34.7	34.7	34.7	34.7	34.7	34.69
Dissolved Oxygen (ml/L)	3.95	4.01	3.63	3.74	3.2	3.73	3.87	3.85	3.68	3.82	3.17	3.28	3.59	3.54	3.58	3.67	3.22	3.68
	4.23	4.17	4.17	4.13	4.13	4.12	4.24	3.98	4.16	4.01	4.18	3.74	4.06	4.04	4.08	3.92	3.8	3.8
Nitrate (μmol/kg)	33.33	33.59	32.85	34.02	33.93	34.46	33.72	34.47	33.66	34.49	34.12	35.99	33.73	34.14	33.95	33.95	34.33	34.58
	34.95	34.42	35.48	35.02	37.05	35.43	34.6	34.73	35.36	35.06	36.93	36.82	34.86	34.59	36.31	35.51	37.24	36.05
Phosphate (μmol/kg)	2.3	2.28	2.23	2.32	2.16	2.29	2.28	2.35	2.32	2.4	2.14	2.38	2.3	2.34	2.28	2.4	2.37	2.41
	2.44	2.38	2.5	2.42	2.63	2.47	2.55	2.46	2.58	2.44	2.6	2.56	2.49	2.42	2.55	2.55	2.53	2.51
Silicate (μmol/kg)	126.85	133.69	129.49	129.51	129.95	137.88	129.94	133.85	131.51	135.75	138.55	152.33	134.92	139.27	135.51	139	144.02	144.02
	138.4	136.6	146.8	145.4	166.1	145.44	140.33	138.91	145.4	143.14	160.11	160.22	142.71	142.83	151.13	151.21	154.23	149
pH	7.94	7.95	7.94	7.94	7.9	7.92	7.94	7.95	7.92	7.91	7.9	7.9	7.93	7.93	7.91	7.92	7.92	7.94
	7.97	7.96	7.96	7.96	7.95	7.95	7.96	7.96	7.96	7.93	7.95	7.94	7.96	7.95	7.94	7.93	7.94	7.94
Bottom-Water Particulate Matter (μg/L)	4.43	4.85	2.9	3.55	3.28	3.54	4.5	5.33	3.73	5.27	3.71	3.73	5.13	5.23	4.69	5.52	3.29	4.22
	9.88	6.04	4.29	3.9	4.34	4.19	10.06	6.28	5.53	5.89	4.71	4.39	7.47	5.79	6.28	6.4	4.75	4.91
Nepheloid Thickness (m)	0	5.69	0	0	0	0	0	0	0	0	0	0	0	0	0	0	0	0
	36.67	12.75	0	0	0	0	37.31	3.52	0	0	0	0	4.66	0	0	0	0	0
Calcite Saturation (%)	60.81	60.81	61.78	62.74	61.95	65.3	63.37	64.45	63.61	65.12	63.71	69.22	64.45	64.87	63.94	64.66	64.84	65.88
	70.41	67.91	66.1	66.07	71.18	69.01	72.76	67.88	66.58	68.72	71.23	71.18	70.78	70.84	71.09	71.09	71.45	68.65
Net Primary Production
VGPM 1998 - 2010 (g C/m2/y)	62.7252	70.7151	73.7629	90.9945	90.8704	91.2828	82.5812	95.7468	92.3669	106.901	97.9477	96.0899	104.288	114.96	105.781	111.197	99.364	105.16
	91.8449	93.21	108.266	112.588	109.109	98.9953	112.876	124.6	128.546	127.655	131.59	103.222	137.072	135.389	133.776	137.62	127.79	124.589
VGPM 2010 - 2017 (g c/m2/y)	55.8742	61.6083	68.5689	84.5924	80.8329	82.9025	69.0507	82.8769	85.7202	91.6807	94.2138	89.9542	90.0857	100.543	90.4287	95.2212	88.4432	90.4105
	85.8188	77.2742	98.4368	102.572	99.6231	93.4947	100.236	112	116.373	109.27	115.249	100.437	125.33	121.435	116.654	118.599	109.113	104.124
CBPM 1998 - 2010 (g C/m2/y)	156.702	165.903	151.84	161.005	139.623	139.806	188.46	205.969	184.172	209.864	170.189	150.457	210.974	232.958	208.495	217.04	206.477	209.758
	196.709	206.28	200.575	203.374	190.242	168.984	248.269	262.22	240.71	253.142	241.772	191.417	299.877	288.587	273.126	277.816	249.853	242.316
CBPM 2010 - 2017 (g C/m2/y)	161.399	168.407	154.563	167.415	142.273	142.273	187.004	205.608	188.278	212.346	182.547	158.968	211.817	237.655	212.018	216.744	206.63	207.63
	206.068	198.221	214.996	218.051	198.91	179.226	246.663	267.976	253.792	254.85	249.788	205.404	307.246	290.657	273.465	273.323	249.572	238.035
CAFE 2010 - 2017 (g C/m2/y)	170.539	172.842	162.812	176.81	149.712	150.928	191.103	209.174	192.289	211.788	187.183	160.819	214.332	229.519	211.788	217.66	208.816	210.412
	201.188	197.045	205.433	211.645	195.936	185.04	230.567	244.816	232.381	242.404	230.866	200.166	263.172	261.227	251.952	258.132	241.783	234.162
Particulate Organic Flux Data
Lutz POC Flux 1997 - 2004 (g C/m2/y)	0.86	0.96	1	1.25	1.23	1.22	1.05	1.29	1.16	1.38	1.33	1.33	1.24	1.58	1.27	1.46	1.37	1.37
	1.2	1.18	1.45	1.48	2.27	1.62	1.58	1.8	1.7	1.78	1.79	1.59	2.07	2.08	2.12	2.12	1.86	1.81
Lutz POC Flux 1998 - 2014 (g C/m2/y)	0.89	0.98	1.03	1.27	1.28	1.3	1.09	1.31	1.21	1.41	1.41	1.4	1.35	1.59	1.36	1.5	1.47	1.47
	1.2	1.19	1.45	1.49	1.53	1.42	1.56	1.8	1.64	1.77	1.69	1.55	2.01	2.06	2.01	2.03	1.83	1.74
Climate Change Data
Temperature % change	0.02	0.02	0.01	0.01	0.01	0.01	0.01	0.01	0.01	0.01	0.01	0.01	0.01	0.01	0.01	0.01	0.01	0.01
	0.03	0.02	0.02	0.02	0.02	0.01	0.02	0.02	0.02	0.01	0.02	0.02	0.02	0.02	0.02	0.02	0.02	0.02
O2 % change	-7.71	-7.56	-7.59	-5.05	-3.36	-2.03	-7.73	-4.65	-7.5	-3.71	-3.26	-2.91	-4.43	-4.25	-6.01	-6.42	-6.1	-5.86
	-4.2	-6.59	-1.35	-1.34	-1.25	-1.25	-2.52	-2.85	-1.34	-1.94	-1.17	-1.43	-2.47	-2.53	-1.87	-2.05	-1.06	-1.37
pH % change	-0.27	-0.26	-0.26	-0.16	-0.1	-0.04	-0.28	-0.19	-0.27	-0.13	-0.09	-0.08	-0.19	-0.14	-0.18	-0.19	-0.19	-0.18
	-0.11	-0.21	-0.02	-0.01	0	0	-0.11	-0.11	-0.01	-0.06	-0.01	-0.04	-0.09	-0.09	-0.03	-0.05	-0.01	-0.01
Calcite Saturation % change	-4.54	-4.3	-4.34	-2.27	-1.16	-0.26	-4.64	-3.03	-4.44	-2.06	-1.26	-0.97	-2.92	-1.95	-2.79	-2.86	-2.98	-2.91
	-1.14	-3.35	0.33	0.4	0.58	0.58	-1.42	-1.37	0.4	-0.56	0.5	-0.21	-1.08	-0.95	-0.04	-0.38	0.52	0.45
POC Flux % change	-31.48	-28.32	-24.31	-24.33	-30	-23.21	-28.02	-14.42	-25.01	-8.28	-25.58	-30.74	-16.05	-12.51	-10.74	-8.87	-21.93	-3.46
	-19.66	-23.1	-15.49	-16.6	-11.66	-12.22	-7.75	-7.89	-5.06	-0.38	-6.59	-17.68	-6.09	-7.47	5.34	4.45	6.02	6.02
